# Supplementary material for: A bioinspired sulfur-surrounded iron catalyst for ammonia synthesis
Source: Royal Society of Chemistry journal article supplement (doi:10.1039/d4ta00710g), 2024-01-01
Supplement: d4ta00710g1.pdf [file d4ta00710g1.pdf]

## Supplementary Information for

### Bioinspired sulfur-surrounded iron catalyst for ammonia synthesis

*Na Zhang<sup>a</sup>, Yubing Si<sup>b</sup>, Qiang Fu<sup>c</sup>, Xing Chen<sup>a,\*</sup>*

- a. Institute of Molecular Plus, School of Chemical Engineering and Technology, Haihe Laboratory of Sustainable Chemical Transformations, Tianjin University, Tianjin 300192, PR China
- b. College of Chemistry, Zhengzhou University, Zhengzhou 450001, PR China
- c. School of Future Technology, University of Science and Technology of China, Hefei 230026, PR China

\*: Corresponding Author, xing\_chen@tju.edu.cn

Keywords: first principles, nitrogenase, NH<sub>3</sub> synthesis, bionic design

## Outline of Supplementary Information

|                                                                                                             |    |
|-------------------------------------------------------------------------------------------------------------|----|
| Section 1. Microkinetic Modeling Description .....                                                          | 3  |
| Section 2. Electronic Structures of FeMo-co and Fe <sub>3</sub> S <sub>3</sub> Cluster .....                | 4  |
| 2.1 Bader charge of FeMo-co and Fe <sub>3</sub> S <sub>3</sub> cluster .....                                | 4  |
| 2.2 PDOS of Fe atoms in the Fe <sub>3</sub> S <sub>3</sub> cluster .....                                    | 4  |
| Section 3. Stability of the Fe <sub>3</sub> S <sub>3</sub> Cluster.....                                     | 5  |
| Section 4. N <sub>2</sub> and H <sub>2</sub> Activation on the Fe <sub>3</sub> S <sub>3</sub> Cluster ..... | 7  |
| 4.1 Possible N <sub>2</sub> adsorption configurations .....                                                 | 7  |
| 4.2 Bader charge of N <sub>2</sub> adsorption system .....                                                  | 7  |
| 4.3 Electronic DOS of N <sub>2</sub> in free and adsorbed states .....                                      | 8  |
| 4.4 H <sub>2</sub> dissociation .....                                                                       | 8  |
| Section 5. Reaction Mechanism.....                                                                          | 10 |
| 5.1 All possible intermediates of associative pathway.....                                                  | 10 |
| 5.2 Reaction energy diagram of four inferior reaction pathways.....                                         | 11 |
| 5.3 Reaction energy and kinetic barrier of all elementary reactions.....                                    | 12 |
| Section 6. Bader Charge Analysis.....                                                                       | 13 |
| 6.1 Functionality of Mo atoms for NH <sub>3</sub> production .....                                          | 13 |
| 6.2 Bader charge analysis for N <sub>2</sub> distal hydrogenation with *NH/*NH <sub>3</sub> .....           | 14 |
| Section 7. Microkinetic Simulations .....                                                                   | 15 |
| 7.1 Coverage of surface species of the optimal reaction pathway .....                                       | 15 |
| 7.2 Microkinetic modeling of other four reaction pathways.....                                              | 16 |
| 7.3 Comparison of catalyst performance for NH <sub>3</sub> production.....                                  | 17 |

## Section 1. Microkinetic Modeling Description

The reaction rate constant  $k$  is given by the Arrhenius equation

$$k = \frac{k_B T}{h} e^{\frac{-\Delta G_{TS}}{k_B T}},$$

$k_B$  is the Boltzmann constant,  $T$  is the temperature,  $h$  is the Plank constant, and  $\Delta G_{TS}$  is the free energy of the transition state of the elementary step. The equilibrium

constant for elementary step  $i$  is expressed by  $K_i = \frac{k_i}{k_{-i}}$ . The reaction rate of the elementary step can be expressed by

$$r_j = k_j \prod_i \theta_i^{v_i^j},$$

$\theta_i$  is the coverage of surface specie  $i$ ,  $k_j$  is the rate constant, and  $v_i^j$  is the stoichiometry of species  $i$  in the elementary step  $j$ . The sum of coverage of reaction species and empty adsorption sites is equal to 1

$$\sum_i \theta_i + \theta^* = 1,$$

$\theta^*$  is the coverage of the empty site. In this study, we considered co-adsorption of intermediates, thus the reaction rate of elementary step  $i$  ( $*a/*b \rightarrow *c/*d$ ) can be expressed by  $r_i = k_i \theta_{*a/*b} - k_{-i} \theta_{*c/*d}$ .

## Section 2. Electronic Structures of FeMo-co and Fe<sub>3</sub>S<sub>3</sub> Cluster

### 2.1 Bader charge of FeMo-co and Fe<sub>3</sub>S<sub>3</sub> cluster

The Bader charge distributions on the FeMo co-factor and Fe<sub>3</sub>S<sub>3</sub> cluster are found in Table S1 and Table S2, respectively. Based on our findings, it is evident that the electrons transfer from Fe atoms to the surrounding S and center C atoms in FeMo-co. Similarly, in the case of the Fe<sub>3</sub>S<sub>3</sub> cluster, the Bader charge analysis result reveals that electrons transfer from three Fe atoms to the S-rich environment. This observation is aligning with the electron transfer behavior observed between Fe and S atoms in the FeMo co-factor.

Table S1. The Bader charge of FeMo cofactor.

| Atom            | C               | S <sub>1</sub>  | S <sub>2</sub>  | S <sub>3</sub>  | S <sub>4</sub>  | S <sub>5</sub>  | S <sub>6</sub>  | S <sub>7</sub>  | S <sub>8</sub>  | S <sub>9</sub> |
|-----------------|-----------------|-----------------|-----------------|-----------------|-----------------|-----------------|-----------------|-----------------|-----------------|----------------|
| Bader Charge  e | -0.83           | -0.52           | -0.50           | -0.47           | -0.47           | -0.52           | -0.52           | -0.50           | -0.53           | -0.55          |
| Atom            | Fe <sub>1</sub> | Fe <sub>2</sub> | Fe <sub>3</sub> | Fe <sub>4</sub> | Fe <sub>5</sub> | Fe <sub>6</sub> | Fe <sub>7</sub> | Mo <sub>1</sub> | Fe <sub>1</sub> | /              |
| Bader Charge  e | 0.67            | 0.64            | 0.64            | 0.65            | 0.66            | 0.60            | 0.65            | 0.92            | 0.67            | /              |

Table S2. Bader charge of the Fe<sub>3</sub>S<sub>3</sub> cluster.

| Atom            | Bader Charge  e |
|-----------------|-----------------|
| Fe <sub>1</sub> | 0.50            |
| Fe <sub>2</sub> | 0.48            |
| Fe <sub>3</sub> | 0.54            |
| S <sub>18</sub> | -0.67           |
| S <sub>24</sub> | -0.59           |
| S <sub>26</sub> | -0.64           |

### 2.2 PDOS of Fe atoms in the Fe<sub>3</sub>S<sub>3</sub> cluster

The electronic partial density of states (PDOS) plots of Fe moiety indicate that the three Fe atoms are in the similar electronic states, as shown in Figure S1. Notably, all three Fe atoms with unpaired  $\alpha$  (spin-up) electrons are spin-polarized. The spin polarization serves as a significant characteristic of the Fe atoms in the system.

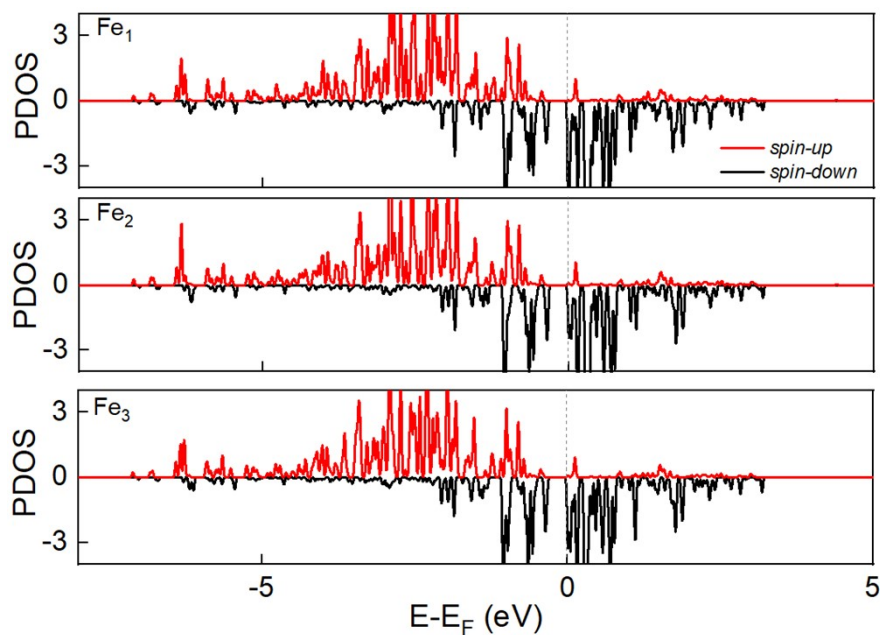

Figure S1. PDOS of the three Fe atoms of the  $\text{Fe}_3\text{S}_3$  cluster. The red and black lines represent spin up and spin down, respectively.

### Section 3. Stability of the $\text{Fe}_3\text{S}_3$ Cluster

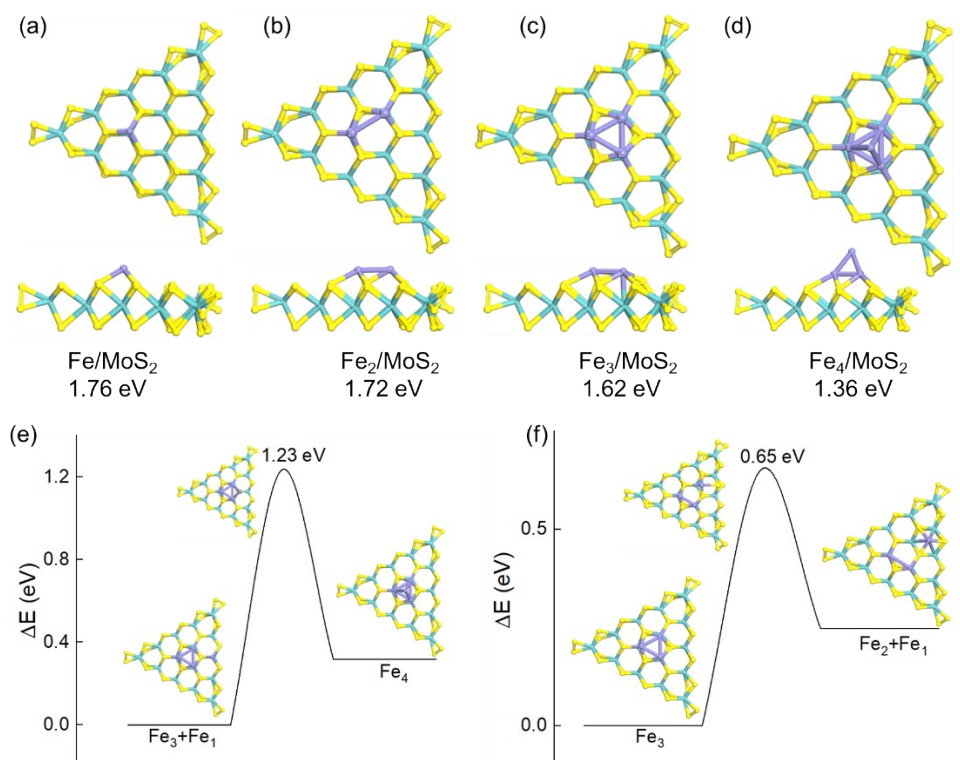

Figure S2. The  $\text{Fe}_3\text{S}_3$  cluster is labeled as  $\text{Fe}_3/\text{MoS}_2$  for comparison with other small clusters. Structures and the formation energy of possible clusters (a-d). Energy profile and corresponding

structures of (e) the aggregation of  $\text{Fe}_3$  with  $\text{Fe}_1$  to  $\text{Fe}_4$ , (f) the dissociation of  $\text{Fe}_3$  into  $\text{Fe}_2$  and  $\text{Fe}_1$ .

As displayed in Figure S2a-d, we investigated the formation energies of  $\text{Fe}/\text{MoS}_2$ ,  $\text{Fe}_2/\text{MoS}_2$ ,  $\text{Fe}_3/\text{MoS}_2$ , and  $\text{Fe}_4/\text{MoS}_2$ , respectively. We found that the formation energy per iron atom of  $\text{Fe}_3/\text{MoS}_2$  is comparably among the cluster configurations mentioned above. We further discuss whether  $\text{Fe}_3/\text{MoS}_2$  can be stabilized by kinetic effects. As shown in Figure S2e and S2f, the aggregation of  $\text{Fe}_3$  with  $\text{Fe}_1$  to  $\text{Fe}_4$  clusters faces a challenging 1.23 eV kinetic barrier. Regarding the dissociation of  $\text{Fe}_3$  to  $\text{Fe}_2$  and  $\text{Fe}$ , its kinetic barrier is 0.65 eV. However, the energy of  $\text{Fe}_3/\text{MoS}_2$  is 0.25 eV lower than that of  $\text{Fe}_2+\text{Fe}_1/\text{MoS}_2$ , indicating that the aggregation from  $\text{Fe}_2/\text{MoS}_2$  to  $\text{Fe}_3/\text{MoS}_2$  is favored over the dissociation. In summary, the  $\text{Fe}_3/\text{MoS}_2$  cluster is stable and can be feasibly prepared on  $\text{MoS}_2$  support.

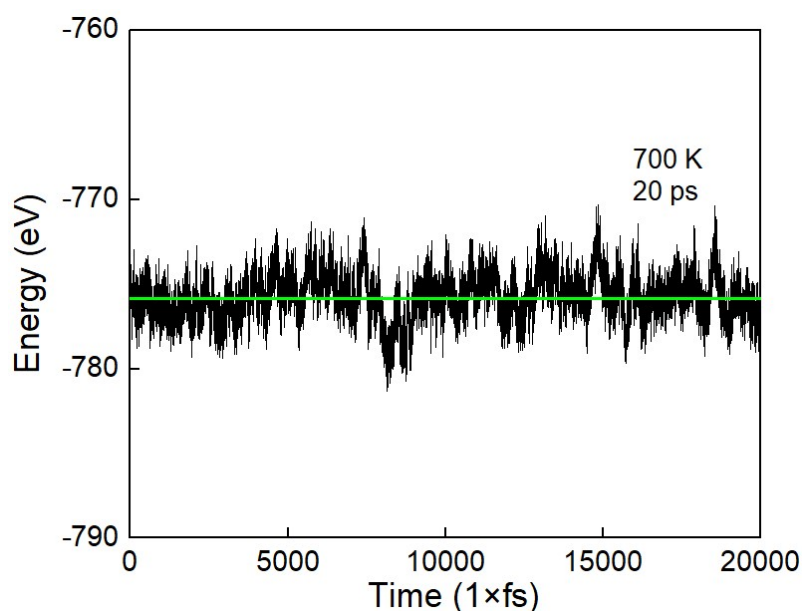

Figure S3. Energy evolution with AIMD simulation time under 700 K.

To confirm the stability of the  $\text{Fe}_3\text{S}_3$  cluster under real reaction conditions, AIMD simulations were employed to evaluate its thermal stability for 20 ps within the NVT ensemble at a high temperature of 700 K (Figure S3). The structure of the  $\text{Fe}_3\text{S}_3$  cluster remained largely unchanged throughout the simulation period. Notably, the Fe-related active site of the cluster was well preserved, further confirming its stability under the high-temperature conditions employed in the simulation. This observation suggests the  $\text{Fe}_3\text{S}_3$  cluster exhibits robustness and maintains its catalytic properties over the course of the simulation.

## Section 4. N<sub>2</sub> and H<sub>2</sub> Activation on the Fe<sub>3</sub>S<sub>3</sub> Cluster

### 4.1 Possible N<sub>2</sub> adsorption configurations

In order to determine the most stable adsorption structure for N<sub>2</sub> activation, various adsorption states are considered. Among them, the side-on adsorption configuration (Figure S4d) is the most stable one with the lowest adsorption energy.

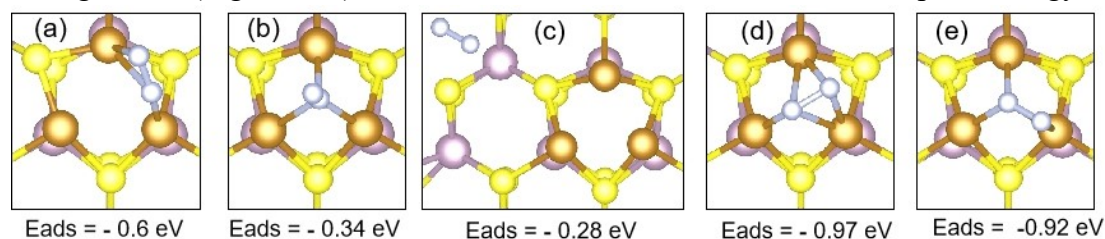

Figure S4. Considered N<sub>2</sub> adsorption states and their adsorption energies.

### 4.2 Bader charge of N<sub>2</sub> adsorption system

The Bader charge distributions on \*N<sub>2</sub>/Fe<sub>3</sub>S<sub>3</sub> are presented in Table S3. When N<sub>2</sub> is chemisorbed on the Fe<sub>3</sub>S<sub>3</sub> cluster, the electrons transfer from Fe atoms to the anti-bonding orbitals of N<sub>2</sub>. The electron transfer weakens the stable N≡N bond. Specifically, the Bader charge of chemisorbed N<sub>2</sub> decreases to -0.87 |e|, as evidence of electron transfer from Fe to N<sub>2</sub>.

Table S3. The Bader charge of \*N<sub>2</sub>/Fe<sub>3</sub>S<sub>3</sub> complex.

| Atom            | Bader Charge  e |
|-----------------|-----------------|
| Fe <sub>1</sub> | 0.31            |
| Fe <sub>2</sub> | 0.28            |
| Fe <sub>3</sub> | 0.26            |
| S <sub>18</sub> | -0.03           |
| S <sub>24</sub> | -0.11           |
| S <sub>26</sub> | -0.03           |
| N <sub>1</sub>  | -0.3            |
| N <sub>2</sub>  | -0.57           |

### 4.3 Electronic DOS of N<sub>2</sub> in free and adsorbed states

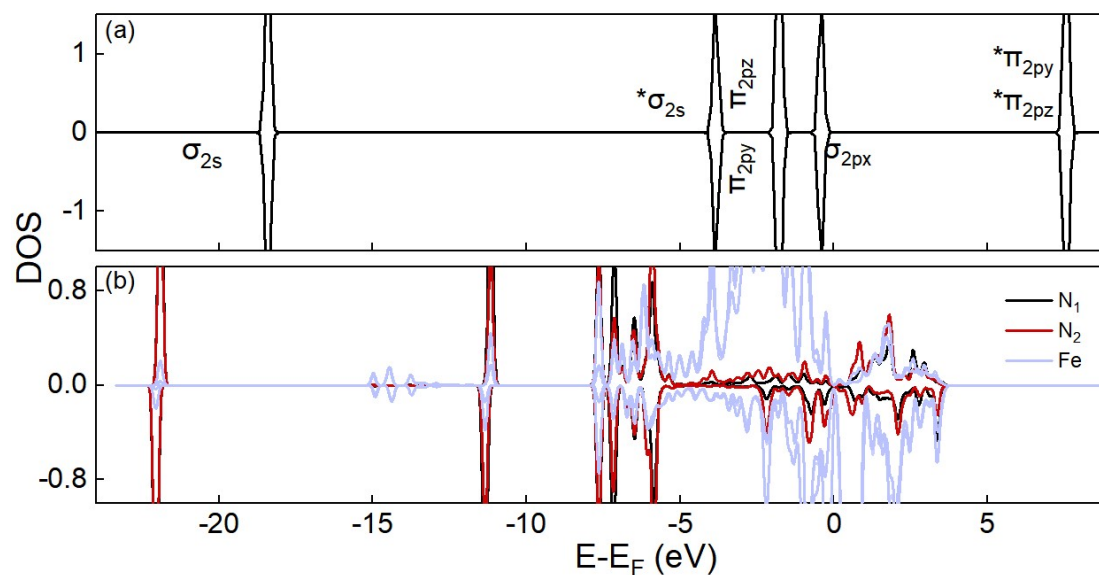

Figure S5. Electronic DOS of (a) free N<sub>2</sub> and (b) N<sub>2</sub>/Fe<sub>3</sub>S<sub>3</sub>.

The activation of N<sub>2</sub> on the Fe<sub>3</sub>S<sub>3</sub> cluster can be effectively explained through the analysis of the electronic density of states (DOS). As shown in Figure S5b, when N<sub>2</sub> is chemisorbed on Fe<sub>3</sub>S<sub>3</sub>, the degenerate  $\pi$  orbitals exhibit a significant degree of overlap with the  $d$  orbitals of Fe atoms. In the vicinity of the Fermi level, the  $\pi^*$  orbitals strongly overlap with the  $d$  orbitals, indicating that electrons from the Fe atoms contribute to the anti-bonding state of N<sub>2</sub>, thereby weakening the stable N $\equiv$ N bond. In contrast to  $\sigma$  donation observed in the end-on adsorption configuration,  $\pi$  donation plays a predominant role in N<sub>2</sub> activation within the side-on adsorption configuration. The activated N<sub>2</sub> molecule exhibits spin-polarization due to the presence of unpaired  $\beta$  electrons near the Fermi level. The electronic configuration highlights the key role of  $\pi$  orbitals and demonstrates the spin-polarized nature of the activated N<sub>2</sub> molecule on the Fe<sub>3</sub>S<sub>3</sub> cluster.

### 4.4 H<sub>2</sub> dissociation

We investigated the adsorption of H<sub>2</sub> on different sites, e.g., different S and Fe sites. As shown in Figure S6a, we considered all five inequivalent S adsorption sites, along with the Fe adsorption site for comparison. The adsorption structures and energies are displayed in Figure S6b-g. It is found that H<sub>2</sub> adsorbs more strongly on the S<sub>3</sub> site than on other S sites. However, the adsorption energy of H<sub>2</sub> on the Fe site is



-0.52 eV, which is 0.25 eV stronger than that on the S<sub>3</sub> site (-0.27 eV). This result indicates that H<sub>2</sub> adsorption prefers to occur on the Fe site of the Fe<sub>3</sub>S<sub>3</sub> cluster.

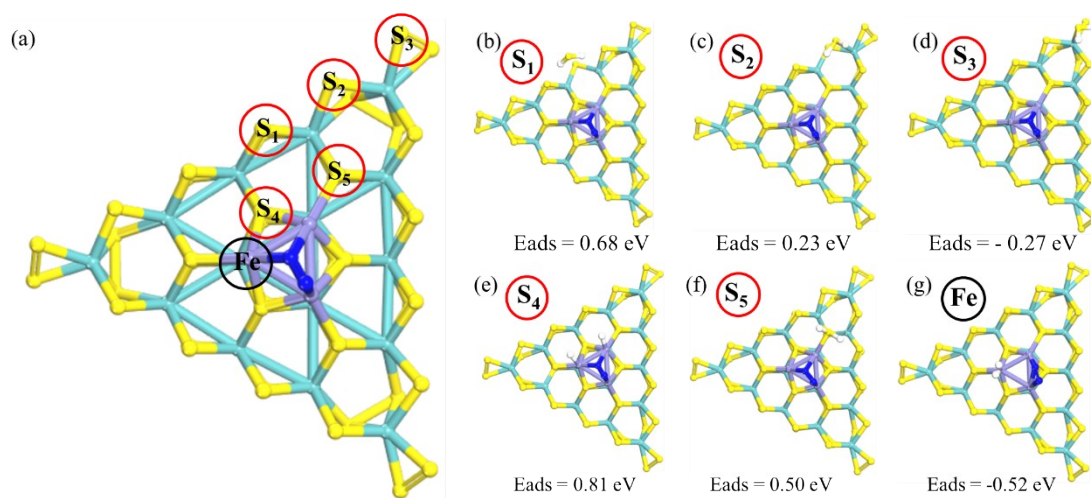

Figure S6. (a) Possible S adsorption sites on Fe<sub>3</sub>@MoS<sub>2</sub>. (b-g) The adsorption structures and energies of H<sub>2</sub> on various S and Fe sites.

H<sub>2</sub> dissociation is H<sub>2</sub> plays a critical role in the intermediate's hydrogenation process. In the Fe<sub>3</sub>S<sub>3</sub> cluster, H<sub>2</sub> can be dissociated by a single Fe atom, accompanied by a change in the N<sub>2</sub> adsorption state (Figure S7a). As shown in Figure S7b, energy-resolved COHP is applied to evaluate H-H bond strength. In the free state of H<sub>2</sub>, two electrons from two H atoms reside in the  $\sigma$  bonding state, while the  $\sigma^*$  orbital remains unoccupied. However, upon adsorption, the  $\sigma^*$  orbital becomes occupied as a result of the donated electrons from Fe *d* orbitals. The electron transfer leads to cleavage of the H-H bond. The calculated iCOHP value for this process is 0.26 eV, indicating the weakening of the H-H bond upon adsorption.

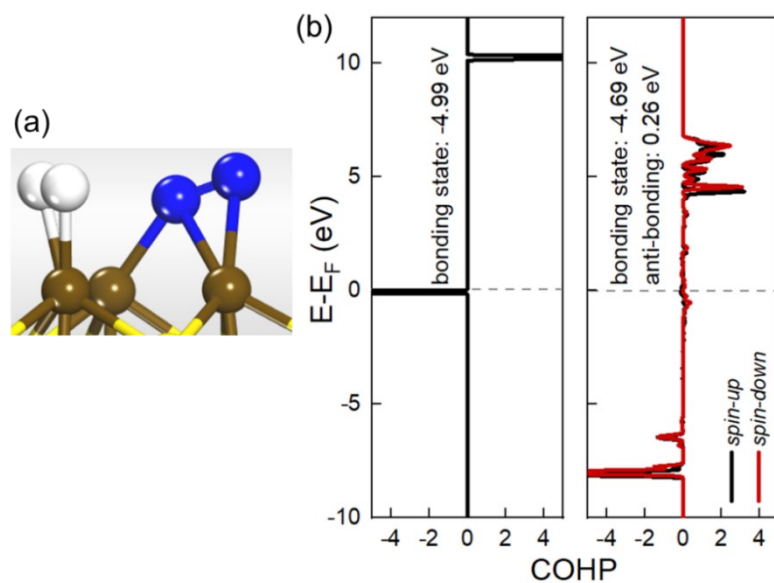

Figure S7. (a) Atomic structure of  $*N_2/2*H$ . (b) COHP of H-H bond in its free and adsorbed state. The positive and negative values represent the  $i$ COHP of the bonding and anti-bonding state, respectively.

## Section 5. Reaction Mechanism

### 5.1 All possible intermediates of associative pathway

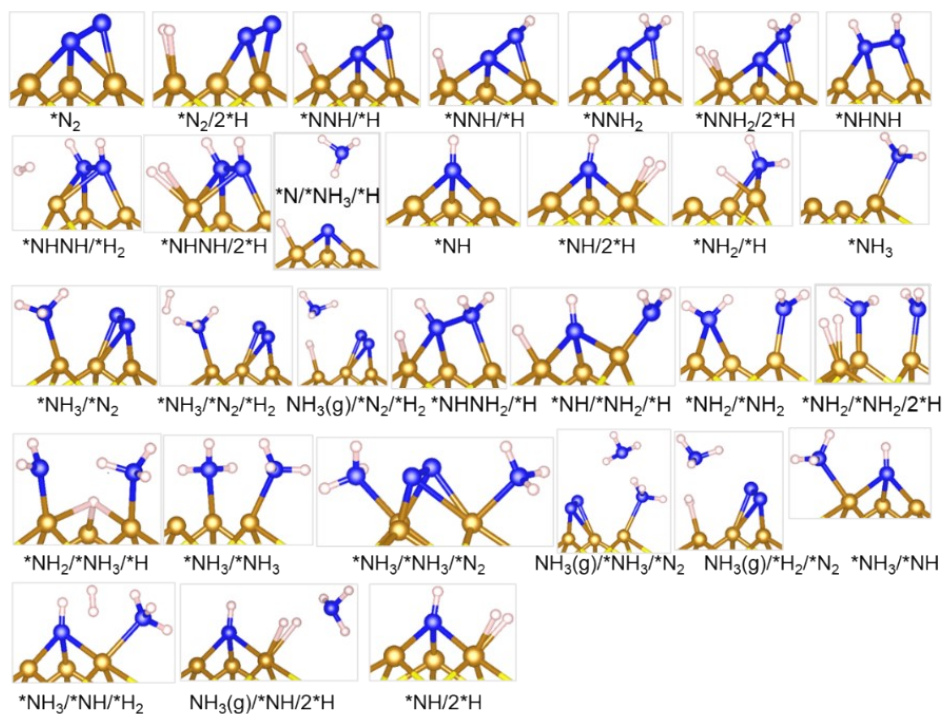

Figure S8. Stable adsorption structures of all intermediates.



overcoming a high kinetic barrier (0.85 eV) compared to the hydrogenation of \*NHNH<sub>2</sub> to \*NH/\*NH<sub>3</sub> (0.49 eV).

Overall, these thermodynamic considerations suggest that the reaction paths involving \*NNH<sub>2</sub> or \*NH<sub>2</sub>/\*NH<sub>2</sub> intermediates are less favorable compared to other pathways for NH<sub>3</sub> synthesis on the Fe<sub>3</sub>S<sub>3</sub> cluster. Thus, the optimal reaction pathway contains \*NNH alternative hydrogenation via \*NHNH and \*NH/\*NH<sub>3</sub> intermediates.

### 5.3 Reaction energy and kinetic barrier of all elementary reactions

Table S4. Calculated reaction energies and kinetic barriers for all considered elementary steps.

| Elementary step                                                                                              | $\Delta E$ (eV) | $E_a$ (eV) |
|--------------------------------------------------------------------------------------------------------------|-----------------|------------|
| N <sub>2</sub> (g) → *N <sub>2</sub>                                                                         | -0.91           | /          |
| *N <sub>2</sub> /H <sub>2</sub> (g) → *N <sub>2</sub> /2*H                                                   | -0.51           | /          |
| *N <sub>2</sub> /2*H → *NNH/*H                                                                               | 0.36            | 1.15       |
| *NNH/*H → *NNH/*H                                                                                            | 0.03            | 0.33       |
| *NNH/*H → *NNH <sub>2</sub>                                                                                  | -0.83           | 0.85       |
| *NNH <sub>2</sub> /H <sub>2</sub> (g) → *NNH <sub>2</sub> /2*H                                               | 0.0013          | /          |
| *NNH <sub>2</sub> /2*H → *NNH <sub>3</sub> /*H(*N/*H/NH <sub>3</sub> (g))                                    | -0.28           | 0.84       |
| *N/*H → *NH                                                                                                  | -1.13           | 0.36       |
| *NH/H <sub>2</sub> (g) → *NH/2*H                                                                             | -0.06           | /          |
| *NH/2*H → *NH <sub>2</sub> /*H                                                                               | -0.27           | 0.76       |
| *NH <sub>2</sub> /*H → *NH <sub>3</sub>                                                                      | -0.30           | 1.02       |
| *NH <sub>3</sub> /N <sub>2</sub> (g) → *NH <sub>3</sub> /*N <sub>2</sub>                                     | -0.68           | /          |
| *NH <sub>3</sub> /*N <sub>2</sub> /H <sub>2</sub> (g) → *NH <sub>3</sub> /*H <sub>2</sub> /*N <sub>2</sub>   | -0.04           | /          |
| *NH <sub>3</sub> /*N <sub>2</sub> /*H <sub>2</sub> → NH <sub>3</sub> (g)/ *N <sub>2</sub> /2*H               | 0.88            | /          |
| *NNH/*H → *NHNH                                                                                              | -0.33           | 0.63       |
| *NHNH/H <sub>2</sub> (g) → *NHNH/2*H                                                                         | -0.40           | /          |
| *NHNH/2*H → *NHNH <sub>2</sub> /*H                                                                           | -0.33           | 0.88       |
| *NHNH <sub>2</sub> /*H → *NH/*NH <sub>2</sub> /*H                                                            | -0.72           | 0.49       |
| *NH/*NH <sub>2</sub> /*H → *NH <sub>2</sub> /*NH <sub>2</sub>                                                | 0.21            | 0.85       |
| *NH <sub>2</sub> /*NH <sub>2</sub> /H <sub>2</sub> (g) → *NH <sub>2</sub> /*NH <sub>2</sub> /2*H             | -0.73           | /          |
| *NH <sub>2</sub> /*NH <sub>2</sub> /2*H → *NH <sub>2</sub> /*NH <sub>3</sub> /*H                             | -1.22           | 0.34       |
| *NH <sub>2</sub> /*NH <sub>3</sub> /*H → *NH <sub>3</sub> /*NH <sub>3</sub>                                  | -0.59           | 1.37       |
| *NH <sub>3</sub> /*NH <sub>3</sub> /N <sub>2</sub> (g) → *NH <sub>3</sub> /*NH <sub>3</sub> /*N <sub>2</sub> | -0.14           | /          |
| *NH <sub>3</sub> /*NH <sub>3</sub> /*N <sub>2</sub> → *NH <sub>3</sub> /NH <sub>3</sub> (g)/ *N <sub>2</sub> | 0.28            | /          |
| *NHNH <sub>2</sub> /*H → *NH/*NH <sub>3</sub>                                                                | -2.03           | 0.49       |

|                                                                                                |       |      |
|------------------------------------------------------------------------------------------------|-------|------|
| $*\text{NH}/*\text{NH}_3/\text{H}_2(\text{g}) \rightarrow *\text{NH}/*\text{NH}_3/*\text{H}_2$ | -0.06 | /    |
| $*\text{NH}/*\text{NH}_3/*\text{H}_2 \rightarrow *\text{NH}/\text{NH}_3(\text{g})/2*\text{H}$  | 0.63  | /    |
| $*\text{NNH}_2/2*\text{H} \rightarrow *\text{NHNH}_2/*\text{H}$                                | -0.27 | 0.97 |
| $*\text{N}_2 \rightarrow 2*\text{N}$                                                           | 2.51  | /    |
| $2*\text{N} + \text{H}_2(\text{g}) \rightarrow 2*\text{N}/2*\text{H}$                          | -0.49 | /    |
| $2*\text{N}/2*\text{H} \rightarrow *\text{NH}/*\text{N}/*\text{H}$                             | 0.09  | /    |
| $*\text{NH}/*\text{N}/*\text{H} \rightarrow *\text{NH}/*\text{NH}$                             | -1.78 | /    |
| $*\text{NH}/*\text{NH} + \text{H}_2(\text{g}) \rightarrow *\text{NH}/*\text{NH}/2*\text{H}$    | 0.17  | /    |
| $*\text{NH}/*\text{NH}/2*\text{H} \rightarrow *\text{NH}_2/*\text{NH}/*\text{H}$               | -1.49 | /    |
| $*\text{NH}_2/*\text{NH}/*\text{H} \rightarrow *\text{NH}_2/*\text{NH}_2$                      | -0.73 | /    |
| $*\text{NH}/*\text{N}/*\text{H} \rightarrow *\text{NH}_2/*\text{N}$                            | -2.64 | /    |
| $*\text{NH}_2/*\text{N} + \text{H}_2(\text{g}) \rightarrow *\text{NH}_2/*\text{N}/*\text{H}_2$ | 0.47  | /    |
| $*\text{NH}_2/*\text{N}/*\text{H}_2 \rightarrow *\text{NH}_3/*\text{N}/*\text{H}$              | -0.62 | /    |
| $*\text{NH}_3/*\text{N}/*\text{H} \rightarrow *\text{NH}_3/*\text{NH}$                         | -2.56 | /    |
| $\text{NH}_2/*\text{N}/*\text{H}_2 \rightarrow \text{NH}_2/*\text{NH}/*\text{H}$               | -0.93 | /    |
| $\text{NH}_2/*\text{NH}/*\text{H} \rightarrow \text{NH}_2/*\text{NH}_2$                        | -0.73 | /    |

## Section 6. Bader Charge Analysis

### 6.1 Functionality of Mo atoms for $\text{NH}_3$ production

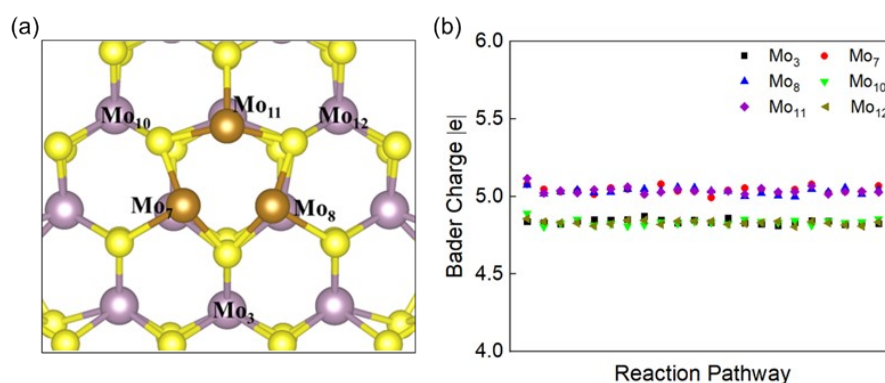

Figure S10. Bader charge variation of Mo atoms along with the optimal reaction pathway, the Mo atoms we selected are near the adsorption site.

To explore the function of the Mo atom in the reaction pathway, we selected the optimal reaction pathway and presented the Bader charge of Mo atoms near the adsorption site. We found that Bader charge slightly changes along the reaction pathway; thus, the Mo atoms in  $\text{Fe}_3\text{S}_3$  cluster are likely to offer a scaffold instead of

the instead of tuning electronic structure.

## 6.2 Bader charge analysis for N<sub>2</sub> distal hydrogenation with \*NH/\*NH<sub>3</sub>

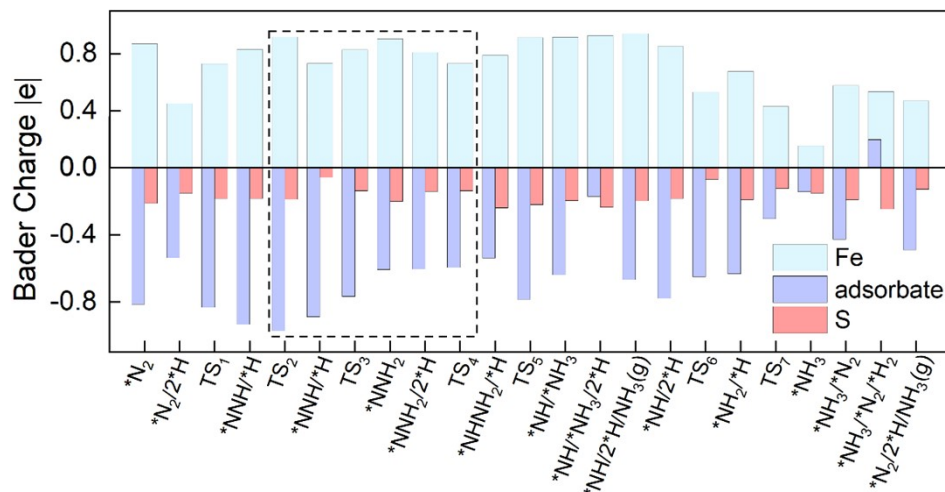

Figure S11. The Bader charge analysis of Fe, S, and adsorbate during the reaction pathway of N<sub>2</sub> distal hydrogenation with \*NH/\*NH<sub>3</sub>.

Table S5. Bader charge of Fe, S, and adsorbates along the reaction pathway (alternative and distal).

| N <sub>2</sub> alternative hydrogenation with NH/NH <sub>3</sub> |         |          |           | N <sub>2</sub> distal hydrogenation with NH/NH <sub>3</sub> |          |           |           |
|------------------------------------------------------------------|---------|----------|-----------|-------------------------------------------------------------|----------|-----------|-----------|
|                                                                  | Fe      | S        | adsorbate |                                                             | Fe       | S         | adsorbate |
| N <sub>2</sub>                                                   | 0.86898 | -0.81448 | -0.21305  | N <sub>2</sub>                                              | 0.86898  | -0.81448  | -0.21305  |
| N <sub>2</sub> /2H                                               | 0.45166 | -0.53627 | -0.15215  | N <sub>2</sub> /2H                                          | 0.45166  | -0.53627  | -0.15215  |
| TS <sub>1</sub>                                                  | 0.73003 | -0.83096 | -0.18526  | TS <sub>1</sub>                                             | 0.73003  | -0.83096  | -0.18526  |
| NNH/H                                                            | 0.83142 | -0.93328 | -0.18451  | NNH/H                                                       | 0.83142  | -0.93328  | -0.18451  |
| TS <sub>2</sub> /0.63                                            | 0.78746 | -0.74624 | -0.20804  | TS <sub>2</sub> /0.33                                       | 0.917551 | -0.972272 | -0.188522 |
| NHNH                                                             | 0.95736 | -0.7464  | -0.23164  | NNH/H                                                       | 0.73331  | -0.888717 | -0.05899  |
| NHNH/2H                                                          | 0.79935 | -0.57884 | -0.23877  | TS <sub>3</sub> /0.85                                       | 0.828178 | -0.766177 | -0.138237 |
| TS <sub>3</sub> /0.88                                            | 0.79132 | -0.58625 | -0.19708  | NNH <sub>2</sub>                                            | 0.90395  | -0.606794 | -0.201122 |
| NHNH <sub>2</sub> /H                                             | 0.79001 | -0.53762 | -0.23957  | NNH <sub>2</sub> /2H                                        | 0.81002  | -0.60445  | -0.143404 |
| TS <sub>5</sub>                                                  | 0.91296 | -0.78356 | -0.21975  | TS <sub>4</sub> /0.97                                       | 0.732707 | -0.594738 | -0.13794  |
| *NH/*NH <sub>3</sub>                                             | 0.91633 | -0.63822 | -0.1973   | NHNH <sub>2</sub> /H                                        | 0.79001  | -0.53762  | -0.23957  |
| *NH/*NH <sub>3</sub> /2*H                                        | 0.92724 | -0.17086 | -0.23657  | TS <sub>5</sub>                                             | 0.91296  | -0.78356  | -0.21975  |
| *NH/2*H/NH <sub>3</sub> (g)                                      | 0.94093 | -0.66706 | -0.199    | *NH/*NH <sub>3</sub>                                        | 0.91633  | -0.63822  | -0.1973   |
| *NH/2*H                                                          | 0.85148 | -0.77863 | -0.18489  | *NH/*NH <sub>3</sub> /2*H                                   | 0.92724  | -0.17086  | -0.23657  |
| TS <sub>6</sub>                                                  | 0.53256 | -0.64989 | -0.06962  | *NH/2*H/NH <sub>3</sub> (g)                                 | 0.94093  | -0.66706  | -0.199    |
| *NH <sub>2</sub> /*H                                             | 0.67607 | -0.63297 | -0.19115  | *NH/2*H                                                     | 0.85148  | -0.77863  | -0.18489  |
| TS <sub>7</sub>                                                  | 0.43135 | -0.30354 | -0.12432  | TS <sub>6</sub>                                             | 0.53256  | -0.64989  | -0.06962  |
| *NH <sub>3</sub>                                                 | 0.15365 | -0.14491 | -0.15126  | *NH <sub>2</sub> /*H                                        | 0.67607  | -0.63297  | -0.19115  |
| *NH <sub>3</sub> /*N <sub>2</sub>                                | 0.57866 | -0.42817 | -0.19113  | TS <sub>7</sub>                                             | 0.43135  | -0.30354  | -0.12432  |
| *NH <sub>3</sub> /*N <sub>2</sub> /*H <sub>2</sub>               | 0.53486 | 0.16644  | -0.24763  | *NH <sub>3</sub>                                            | 0.15365  | -0.14491  | -0.15126  |
| *N <sub>2</sub> /*H <sub>2</sub> /NH <sub>3</sub> (g)            | 0.47056 | -0.48884 | -0.12973  | *NH <sub>3</sub> /*N <sub>2</sub>                           | 0.57866  | -0.42817  | -0.19113  |
|                                                                  |         |          |           | *NH <sub>3</sub> /*N <sub>2</sub> /*H <sub>2</sub>          | 0.53486  | 0.16644   | -0.24763  |
|                                                                  |         |          |           | *N <sub>2</sub> /*H <sub>2</sub> /NH <sub>3</sub> (g)       | 0.47056  | -0.48884  | -0.12973  |

N<sub>2</sub> alternative and distal hydrogenation with intermediate \*NH/\*NH<sub>3</sub> reaction pathways share some elementary steps. The elementary steps highlighted by the dashed rectangle only exist in the N<sub>2</sub> distal hydrogenation reaction pathway. The elementary step leading to NHNH<sub>2</sub> in the distal reaction mechanism undergoes a

higher energy barrier (0.97 eV) compared to the alternative reaction mechanism (0.88 eV in Figure 4c). The charge distribution on adsorbates significantly changes from -0.1434 |e| to -0.2396 |e| in the elementary step of the distal reaction. In contrast, the charge distribution roughly maintains in the alternative reaction. The substantial charge transfer could potentially hinder the reaction from  $\text{NNH}_2$  to  $\text{NHNH}_2$ .

## Section 7. Microkinetic Simulations

### 7.1 Coverage of surface species of the optimal reaction pathway

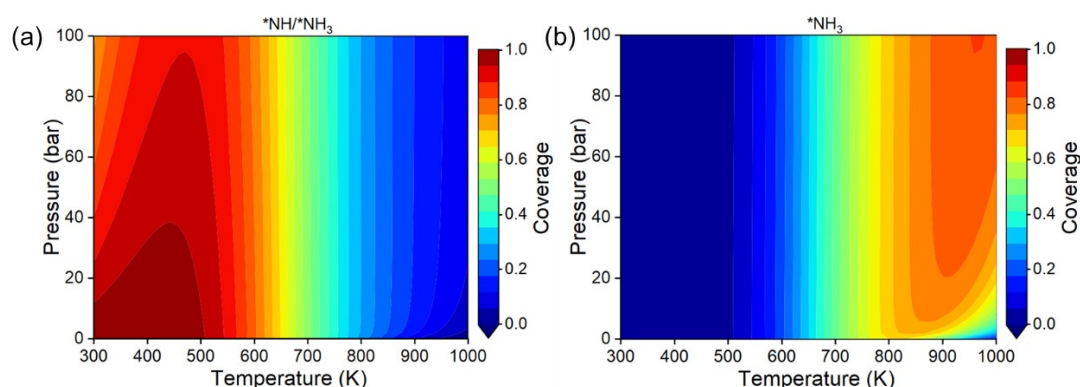

Figure S12. Coverage of surface species correlated with temperature and pressure. Coverage of (a)  $^*\text{NH}/^*\text{NH}_3$  and (b)  $^*\text{NH}_3$  on  $\text{Fe}_3\text{S}_3$  cluster mapped at the pressure of 1-100 bar and the temperature of 300-1000 K. the  $\text{N}_2$ 's partial pressure is fixed at 25% and  $\text{NH}_3$  conversion is set to 2%.

Excessively stable adsorption of surface species on the catalyst surface can impose limitations on catalytic performance. At high temperature of 900 K, the TOF of the  $\text{Fe}_3\text{S}_3$  cluster is predominantly constrained by  $^*\text{NH}_3$  intermediates. However, at low temperatures within the range of 300-500 K, the TOF is less than  $10^{-10} \text{ s}^{-1}\text{site}^{-1}$ . The small TOF value is primarily attributed to the stable adsorption of  $^*\text{NH}/^*\text{NH}_3$  intermediate on the catalyst surface. The strong adsorption hinders the desired catalytic reactions and impedes the overall catalytic performance of the  $\text{Fe}_3\text{S}_3$  cluster at the low temperature range.



## 7.2 Microkinetic modeling of other four reaction pathways

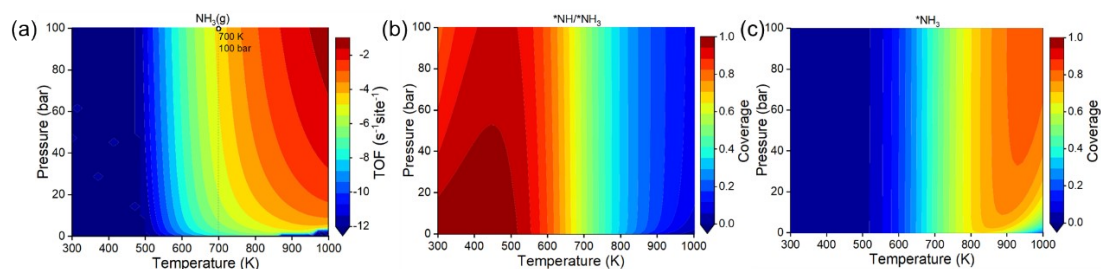

Figure S13. TOF of the  $\text{Fe}_3\text{S}_3$  cluster for  $\text{NH}_3$  production and coverage of surface species correlated with temperature and pressure. (a) TOF for  $\text{NH}_3$  production through  $\text{N}_2$  distal hydrogenation via  $^*\text{NH}/^*\text{NH}_3$  mapped at the temperature of 300-1000 K and the pressure of 0-100 bar. Coverage of (b)  $^*\text{NH}/^*\text{NH}_3$  and (c)  $^*\text{NH}_3$  in reaction pathway on  $\text{Fe}_3\text{S}_3$  cluster.

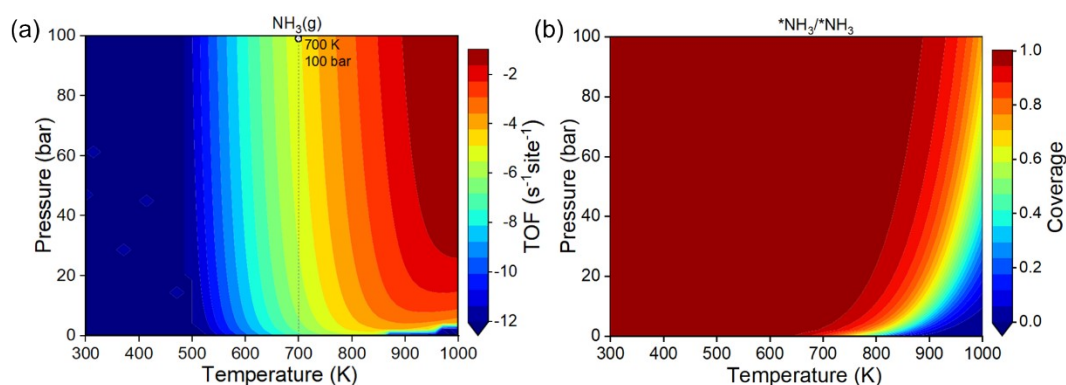

Figure S14. TOF of the  $\text{Fe}_3\text{S}_3$  cluster for  $\text{NH}_3$  production and coverage of surface species correlated with temperature and pressure. (a) TOF for  $\text{NH}_3$  production through  $\text{N}_2$  alternative hydrogenation via  $\text{NH}_2/\text{NH}_2$  mapped at the temperature of 300-1000 K and the pressure of 0-100 bar. (b) Coverage of  $^*\text{NH}_3/^*\text{NH}_3$  in reaction pathway on  $\text{Fe}_3\text{S}_3$  cluster.

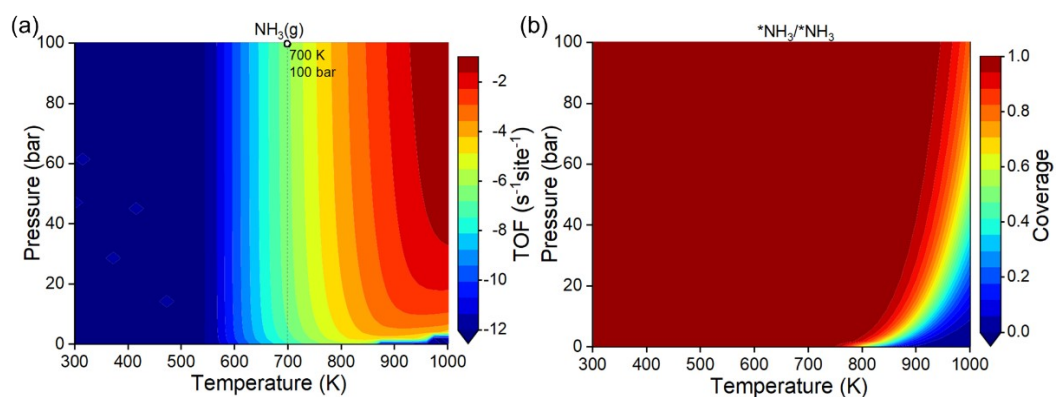

Figure S15. TOF of the  $\text{Fe}_3\text{S}_3$  cluster for  $\text{NH}_3$  production and coverage of surface species correlated with temperature and pressure. (a) TOF for  $\text{NH}_3$  production through  $\text{N}_2$  distal hydrogenation via  $\text{NH}_2/\text{NH}_2$  mapped at the temperature of 300-1000 K and the pressure of 0-100 bar. (b) Coverage of  $^*\text{NH}_3/^*\text{NH}_3$  in reaction pathway on  $\text{Fe}_3\text{S}_3$  cluster.



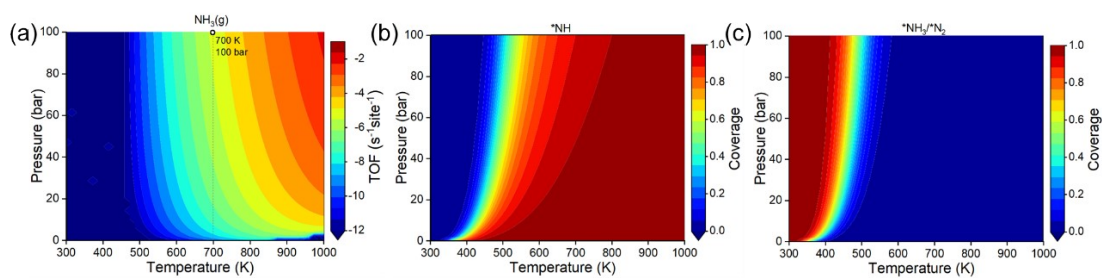

Figure S16. TOF of the Fe<sub>3</sub>S<sub>3</sub> cluster for NH<sub>3</sub> production and coverage of surface species correlated with temperature and pressure. (a) TOF for NH<sub>3</sub> production through N<sub>2</sub> distal hydrogenation via N/H/NH<sub>3</sub>(g) mapped at the temperature of 300-1000 K and the pressure of 0-100 bar. Coverage of (b) \*NH and (c) \*NH<sub>3</sub>/\*N<sub>2</sub> in reaction pathway on Fe<sub>3</sub>S<sub>3</sub> cluster.

### 7.3 Comparison of catalyst performance for NH<sub>3</sub> production

Table S6. Comparison of catalyst performance for NH<sub>3</sub> production in previous studies and this work.

| Catalyst                                        | TOF (site <sup>-1</sup> ·s <sup>-1</sup> ) | Feed gas composition                  | Conversion ratio of NH <sub>3</sub> | Temperature (K) | Ref.      |
|-------------------------------------------------|--------------------------------------------|---------------------------------------|-------------------------------------|-----------------|-----------|
| Fe <sub>3</sub> /Al <sub>2</sub> O <sub>3</sub> | 1.4 × 10 <sup>-2</sup>                     | 1:3 (N <sub>2</sub> :H <sub>2</sub> ) | 10%                                 | 700             | 42        |
| Fe (211)                                        | 2.65 × 10 <sup>-3</sup>                    | 1:3 (N <sub>2</sub> :H <sub>2</sub> ) | 10%                                 | 700             | 42        |
| Ti/ (8, 8) BNNT                                 | 2.98 × 10 <sup>-6</sup>                    | 1:3 (N <sub>2</sub> :H <sub>2</sub> ) | 10%                                 | 700             | 76        |
| Mo <sub>2</sub> /Ag                             | 1.1 × 10 <sup>-3</sup>                     | 1:3 (N <sub>2</sub> :H <sub>2</sub> ) | 2%                                  | 673             | 81        |
| Fe <sub>3</sub> S <sub>3</sub>                  | 4.4 × 10 <sup>-4</sup>                     | 1:3 (N <sub>2</sub> :H <sub>2</sub> ) | 2%                                  | 700             | This work |
